# Supplementary material for: Brain metabolic differences between pure bulbar and pure spinal ALS: a 2-[18F]FDG-PET study
Source: Springer Nature journal article supplement (doi:10.1007/s00415-022-11445-9), 2022-11-02

**Journal name:**

**Journal of Neurology**

**Article Title:**

**Brain metabolic differences between pure bulbar and pure spinal ALS: a 2-<sup>[18F]</sup>FDG-PET study**

**Authors:**

Antonio Canosa, MD, PhD<sup>1,2,3</sup>; Alessio Martino, PhD<sup>3,4</sup>; Alessandro Giuliani, PhD<sup>5</sup>; Cristina Moglia, MD, PhD<sup>1,2</sup>; Rosario Vasta, MD<sup>1</sup>; Maurizio Grassano, MD<sup>1</sup>; Francesca Palumbo, MD<sup>1</sup>; Sara Cabras, MD<sup>1</sup>; Francesca Di Pede, MD<sup>1</sup>; Filippo De Mattei, MD<sup>1</sup>; Enrico Matteoni, MD<sup>1</sup>; Giulia Polverari, MD<sup>6</sup>; Umberto Manera, MD<sup>1,2</sup>; Andrea Calvo, MD, PhD<sup>1,2,7</sup>; Marco Pagani, MD, PhD<sup>3,8</sup>; Adriano Chiò, MD, FAAN<sup>1,2,3,7</sup>

**Equal Author Contributions:** Marco Pagani and Adriano Chiò contributed equally to this work.

**Corresponding Author**

Antonio Canosa, MD, PhD

ALS Centre, 'Rita Levi Montalcini' Department of Neuroscience, University of Turin

Via Cherasco 15, Turin, Italy, 10126

Phone +39(0)116335439

Fax +39(0)116336454

[antonio.canosa@unito.it](mailto:antonio.canosa@unito.it)

ORCID ID: <https://orcid.org/0000-0001-5876-4079>

### **Affiliations**

1. ALS Centre, 'Rita Levi Montalcini' Department of Neuroscience, University of Turin, Turin, Italy
2. Azienda Ospedaliero-Universitaria Città della Salute e della Scienza di Torino, SC Neurologia 1U, Turin, Italy
3. Institute of Cognitive Sciences and Technologies, C.N.R., Rome, Italy
4. Department of Business and Management, LUISS University, Rome, Italy
5. Environment and Health Department, Istituto Superiore di Sanità, Rome, Italy
6. Positron Emission Tomography Centre AFFIDEA-IRMET S.p.A., Turin, Italy
7. Neuroscience Institute of Turin (NIT), Turin, Italy
8. Department of Medical Radiation Physics and Nuclear Medicine, Karolinska University Hospital, Stockholm, Sweden

## Supplemental Material

**Supplemental Table 1.** Clusters showing a statistically significant relative hypometabolism in PB compared to HC.

| p(FWE-corrected) | Cluster extent | Z-score | Talairach coordinates |     |     | Lobe      | Cortical region               | BA |
|------------------|----------------|---------|-----------------------|-----|-----|-----------|-------------------------------|----|
| 0.000            | 7803           | 6.22    | -50                   | -2  | 42  | Frontal   | Left Precentral Gyrus         | 6  |
|                  |                | 5.17    | -10                   | 35  | 42  | Frontal   | Left Medial Frontal Gyrus     | 8  |
|                  |                | 4.99    | -36                   | 6   | 48  | Frontal   | Left Middle Frontal Gyrus     | 6  |
| 0.000            | 2119           | 4.90    | -59                   | -5  | -23 | Temporal  | Left Fusiform Gyrus           | 20 |
|                  |                | 4.25    | -63                   | -6  | -3  | Temporal  | Left Middle Temporal Gyrus    | 21 |
|                  |                | 4.05    | -57                   | -14 | -13 | Temporal  | Left Inferior Temporal Gyrus  | 21 |
| 0.000            | 1508           | 4.60    | -36                   | -76 | -1  | Occipital | Left Inferior Occipital Gyrus | 19 |
|                  |                | 3.46    | -22                   | -91 | 5   | Occipital | Left Middle Occipital Gyrus   | 18 |
|                  |                | 3.42    | -10                   | -79 | 9   | Occipital | Left Cuneus                   | 17 |
| 0.019            | 603            | 4.41    | 14                    | 52  | 29  | Frontal   | Right Superior Frontal Gyrus  | 9  |
|                  |                | 3.90    | 18                    | 61  | 15  | Frontal   | Right Superior Frontal Gyrus  | 10 |
|                  |                | 3.83    | 26                    | 34  | 52  | Frontal   | Right Superior Frontal Gyrus  | 8  |
| 0.000            | 2072           | 4.32    | 57                    | -4  | 37  | Frontal   | Right Precentral Gyrus        | 6  |
|                  |                | 4.27    | 46                    | -16 | 36  | Frontal   | Right Precentral Gyrus        | 4  |
|                  |                | 4.21    | 40                    | -1  | 53  | Frontal   | Right Middle Frontal Gyrus    | 6  |

PB: pure bulbar patients. HC: healthy controls. BA: Brodmann Area.

**Supplemental Table 2.** Clusters showing a statistically significant relative hypometabolism in PS patients compared to HC.

| P (FWE-corrected) | Cluster extent | Z-score | Talairach coordinates |     |     | Lobe      | Cortical Region              | BA |
|-------------------|----------------|---------|-----------------------|-----|-----|-----------|------------------------------|----|
| 0.000             | 14903          | 6.54    | -20                   | -93 | 3   | Occipital | Left Cuneus                  | 17 |
|                   |                | 6.44    | 22                    | -93 | 8   | Occipital | Right Middle Occipital Gyrus | 18 |
|                   |                | 6.24    | 8                     | -91 | 5   | Occipital | Right Cuneus                 | 17 |
| 0.000             | 7625           | 5.29    | -20                   | 39  | -26 | Frontal   | Left Orbital Gyrus           | 11 |
|                   |                | 5.23    | 20                    | 35  | -30 | Frontal   | Right Orbital Gyrus          | 11 |
|                   |                | 5.14    | -40                   | 26  | 23  | Frontal   | Left Middle Frontal Gyrus    | 46 |
| 0.001             | 1126           | 4.51    | 44                    | 6   | 40  | Frontal   | Right Middle Frontal Gyrus   | 6  |
|                   |                | 3.66    | 46                    | 30  | 22  | Frontal   | Right Middle Frontal Gyrus   | 46 |
|                   |                | 3.61    | 53                    | 36  | 11  | Frontal   | Right Inferior Frontal Gyrus | 46 |
| 0.009             | 752            | 3.93    | 34                    | 48  | -2  | Frontal   | Right Middle Frontal Gyrus   | 10 |
|                   |                | 3.89    | 14                    | 59  | 14  | Frontal   | Right Superior Frontal Gyrus | 10 |

PS: pure spinal patients. HC: healthy controls. BA: Brodmann Area.

## Supplemental Fig. 1

### Pure Bulbar (PB) patients versus healthy controls (HC)

Clusters of relative hypometabolism of PB as compared to HC are marked in green on two-dimensional (2D) representation of transversal slices and on 3D rendering projections of the whole brain according to the MNI referential atlas (MRIcroGL software, <https://www.nitrc.org/projects/mricrogl>)

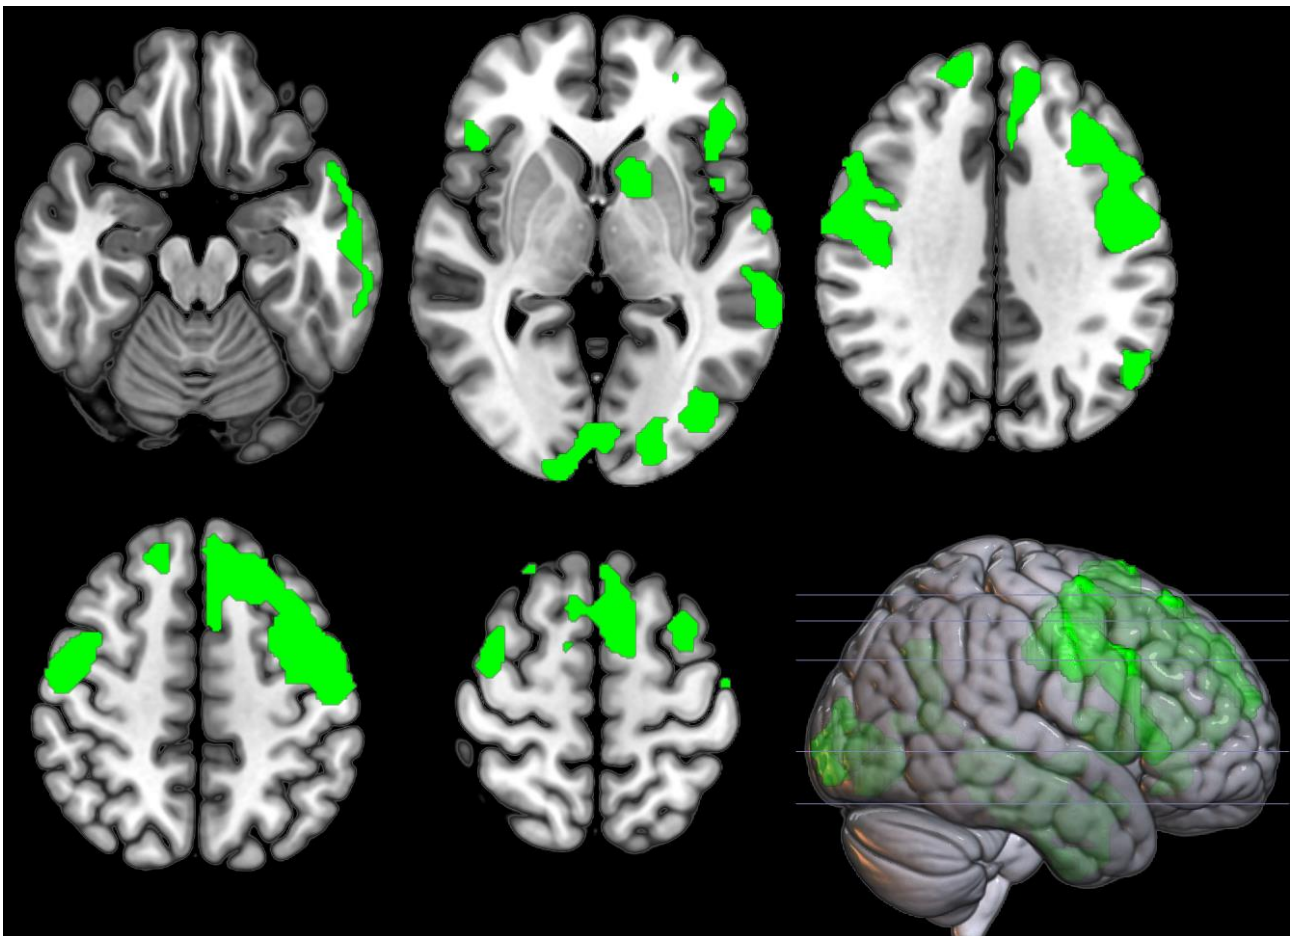

## Supplemental Fig. 2

### Pure Spinal (PS) patients versus healthy controls (HC)

Clusters of relative hypometabolism of PS as compared to HC are marked in blue on two-dimensional (2D) representation of transversal slices and on 3D rendering projections of the whole brain according to the MNI referential atlas (MRIcroGL software, <https://www.nitrc.org/projects/mricrogl>)

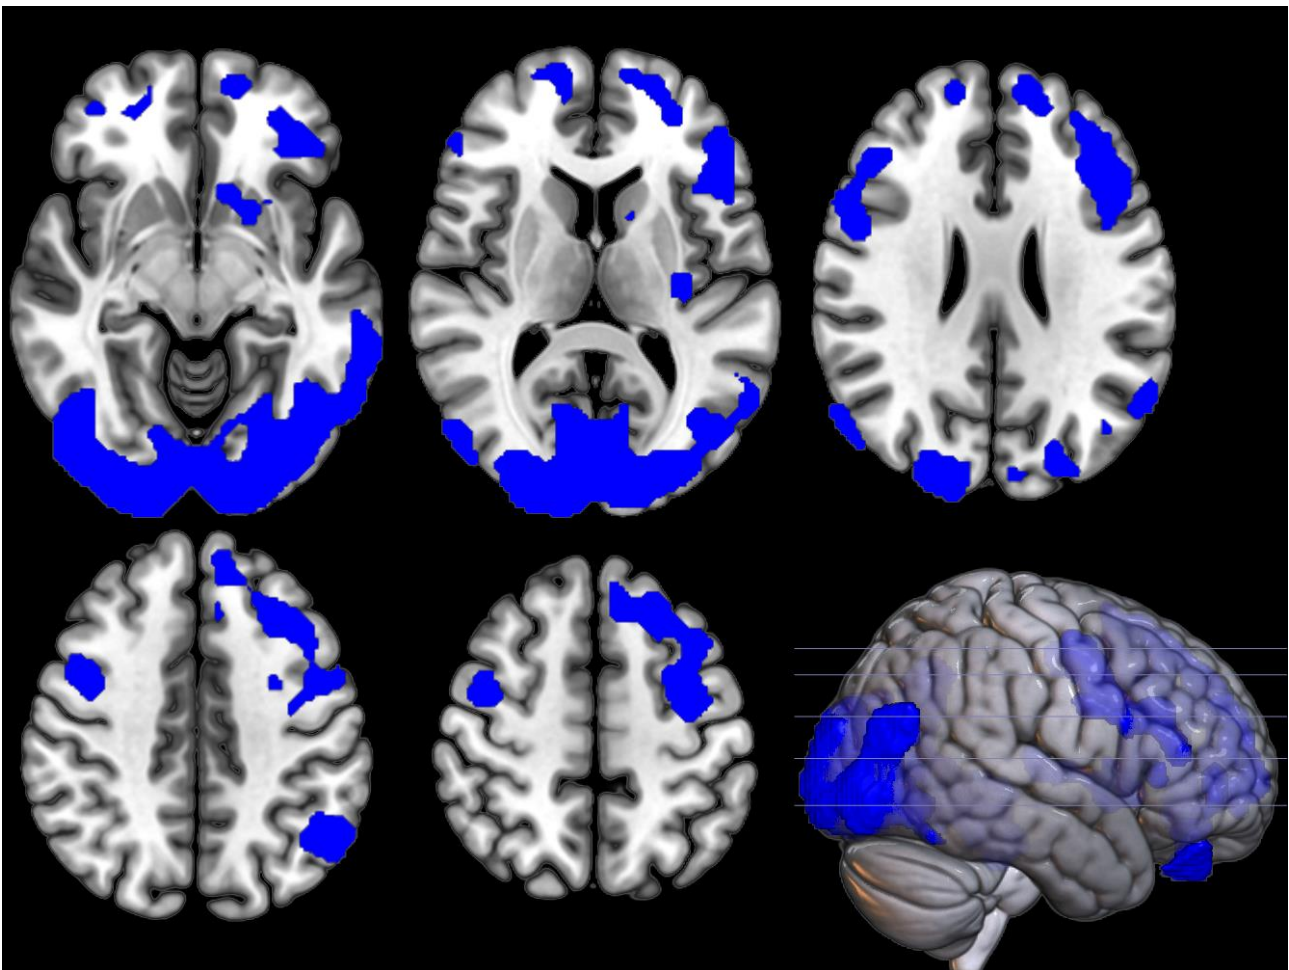

Supplement: MOESM2 [file 23666998]
